# Supplementary material
Source: PubMed Central journal article supplement (PMC7228090)
Supplement: ehp5732.smcontents.508.pdf [file ehp5732.smcontents.508.pdf]

**Note to readers with disabilities:** *EHP* strives to ensure that all journal content is accessible to all readers. However, some figures and Supplemental Material published in *EHP* articles may not conform to [508 standards](#) due to the complexity of the information being presented. If you need assistance accessing journal content, please contact [ehp508@niehs.nih.gov](mailto:ehp508@niehs.nih.gov). Our staff will work with you to assess and meet your accessibility needs within 3 working days.

### **Supplemental Material**

#### **Preterm Birth among Infants Exposed to *in Utero* Ultrafine Particles from Aircraft Emissions**

Sam E. Wing, Timothy V. Larson, Neelakshi Hudda, Sarunporn Boonyarattaphan, Scott Fruin, and Beate Ritz

#### **Table of Contents**

**Table S1.** Maternal and Infant Demographics by Quartiles of UFP Exposure.

**Table S2.** Adjusted logistic regression results, stratified by race/ethnicity and maternal Nativity.

**Table S3.** Count of preterm (PTB) and term births by UFP exposure quartile, stratified by race/ethnicity and maternal Nativity.

**Table S4.** Pearson correlation coefficients ( $r$ ) between UFP exposures by trimester, NO<sub>2</sub>, and airport noise.

**Table S5.** Adjusted logistic regression results according to different categories of UFP exposure.

**Table S6.** Adjusted ORs (95% CIs) of preterm birth by pregnancy trimester-specific exposures to UFP.

**Table S7.** Adjusted logistic regression results of preterm birth with modified elliptical exposure buffers, quartiles of UFP exposure.

**Table S8.** Adjusted logistic regression result of preterm birth stratified by quintile of nSES Index.

**Table S9.** Percent of mothers in quartiles of UFP exposure stratified by quintile of nSES index.

**Table S10.** Adjusted ORs (95% CIs) of preterm birth stratified by educational attainment.

**Table S11.** Adjusted ORs (95% CIs) of very preterm birth ( $n = 2,085$ ) exposure.

**Table S12.** Adjusted ORs (95% CIs) of preterm birth, excluding births within 2 km and 5 km of SMO airport.

**Figure S1.** Hourly wind rose at LAX for the period January 2008 through December 2016 (Station #23174, anemometer height 30 ft, base elevation 108 ft).

**Figure S2.** Schematic side view of tilted volume line source. Mixing depth can vary with hour of the day. Emissions from above the mixing depth will not impact the surface.

**Figure S3.** Diurnal flight activity at LAX by hour.

**Figure S4.** Mobile monitoring transects.

**Figure S5.** Transect Average Particle Number Concentration (#/cc). The numbers refer to the averages of the transect shown in figure S-4. The 1:1 line and the 95% confidence interval of the slope are also shown.

**Figure S6.** AERMOD Model Monthly Average Prediction Locations. Base layers obtained from USGS.gov.

**Figure S7.** Monthly average total flight activity over the study period.

**Figure S8.** Areas above an annual average of 65 dB CNEL. Base layers obtained from USGS.gov.
